1           **Frequency of disturbance alters diversity, function, and underlying**  
2                   **assembly mechanisms of complex bacterial communities**

3

4    **Authors:** Ezequiel Santillan<sup>1,2</sup>, Hari Seshan<sup>1,2†</sup>, Florentin Constancias<sup>1</sup>, Daniela I. Drautz-  
5                           Moses<sup>1</sup>, and Stefan Wuertz<sup>1,2,3\*</sup>

6    **Key words:** community structure, diversity, stochastic-deterministic, neutral-niche, trade-  
7    offs, intermediate disturbance hypothesis, intermediate stochasticity hypothesis

8    **Affiliations:**

9    <sup>1</sup>Singapore Centre for Environmental Life Sciences Engineering, Nanyang Technological  
10    University, 637551, Singapore.

11   <sup>2</sup>Department of Civil and Environmental Engineering, University of California, Davis, CA  
12    95616, U.S.A.

13   <sup>3</sup>School of Civil and Environmental Engineering, Nanyang Technological University,  
14    639798, Singapore.

15

16   \*Correspondence to: Stefan Wuertz, swuertz@ntu.edu.sg.

17   †Present address: Brown and Caldwell, 9665 Chesapeake Drive, Suite 201, San Diego CA  
18    92123, U.S.A.

## 19 **Abstract**

20 Disturbance is known to affect ecosystem structure, but predicting its outcomes remains  
21 elusive. Similarly, community diversity is believed to relate to ecosystem functions, yet the  
22 underlying mechanisms are poorly understood. Here, we tested the effect of disturbance on  
23 the structure, diversity, and ecosystem function of complex microbial communities within an  
24 engineered system. We carried out a microcosm experiment where activated sludge  
25 bioreactors were subjected to a range of disturbances in the form of a toxic pollutant, tracking  
26 changes in ecosystem function. Microbial communities were assessed by combining distance-  
27 based methods, general linear multivariate models,  $\alpha$ -diversity indices, and null model  
28 analyses on metagenomics and 16S rRNA gene amplicon data. A stronger temporal decrease  
29 in  $\alpha$ -diversity at the extreme, undisturbed and press-disturbed, ends of the disturbance range  
30 led to a hump-backed pattern, with the highest diversity found at intermediate levels of  
31 disturbance. Undisturbed and press-disturbed levels displayed the highest community and  
32 functional similarity across replicates, suggesting deterministic processes were dominating.  
33 The opposite was observed amongst intermediately disturbed levels, indicating stronger  
34 stochastic assembly mechanisms. Tradeoffs were observed in community function between  
35 organic carbon removal and both nitrification and biomass productivity, as well as between  
36 diversity and these functions. Hence, not every ecosystem function was favoured by higher  
37 community diversity. Our results show that the assessment of changes in diversity, along with  
38 the underlying stochastic-niche assembly processes, is essential to understanding the impact  
39 of disturbance in complex microbial communities.

## 40 **Importance**

41 Microbes drive the Earth's biogeochemical cycles, yet how they respond to perturbations like  
42 anthropogenic pollutants is poorly understood. As human impact continues to increase  
43 worldwide, foreseeing how disturbances will affect microbial communities and the ecosystem  
44 services they provide is key for ecosystem management and conservation efforts. Employing  
45 laboratory-scale wastewater treatment bioreactors, this study shows that changes in  
46 community diversity accompany variations in the underlying deterministic-stochastic  
47 assembly mechanisms. Disturbances could promote stochastic community structuring, which  
48 despite harboring higher diversity could lead to variable overall function, possibly explaining  
49 why after similar perturbations the process outcome differs. A conceptual framework, termed  
50 the 'intermediate stochasticity hypothesis' is proposed to theoretically predict bacterial  
51 community shifts in diversity and ecosystem function, given a range of possible disturbance  
52 types, in a well-replicated time-series experiment. Our findings are relevant for managing  
53 complex microbial systems, which could display similar responses to disturbance, like  
54 oceans, soils or the human gut.

## 55 **Introduction**

56       Understanding what drives patterns of community succession and structure remains a  
57 central goal in ecology (1, 2) and microbial ecology (3), especially since community diversity  
58 and assembly are thought to regulate ecosystem function (4, 5). The factors influencing the  
59 balance between mechanisms of community assembly are under debate and require studies  
60 across a range of ecosystems (6, 7). Assembly processes can be either stochastic, assuming  
61 that all species have equal fitness and that changes in structure arise from random events of  
62 ecological drift (8), or deterministic, when communities form as a result of niche diversity  
63 shaped by abiotic and biotic factors (9). Deterministic and stochastic assembly dynamics  
64 have been proposed to simultaneously act in driving assembly patterns observed in nature  
65 (10-14). This has stimulated scientific discourse including modelling of experimental data  
66 (15-18) and both observational and manipulative experimentation in a variety of ecosystems,  
67 like deserts on a global scale (19), groundwater (6), subsurface environments (2, 20, 21), soil  
68 plant-fungi associations (22), rock pools (23), water ponds (24), and sludge bioreactors (7,  
69 17, 25). These prior studies emphasized the need to understand what governs the relative  
70 balance between stochastic and deterministic processes and what conditions would lead to  
71 stochastic processes overwhelming deterministic processes, particularly under disturbance  
72 (21). To investigate their roles well-replicated time series experiments are needed (6, 25).

73       Disturbance is defined in ecology as an event that physically inhibits, injures or kills  
74 some individuals in a community, creating opportunities for other individuals to grow or  
75 reproduce (26). Under disturbance, organisms may benefit from being able to grow,  
76 reproduce, and interact with other members of the community in the absence of specific  
77 familiarity with the environment. It is deemed a main factor influencing variations in species  
78 diversity (27) and structuring of ecosystems (28, 29), but a clear understanding of its  
79 outcomes is lacking (30). Particularly, the intermediate disturbance hypothesis (IDH) (31)

80 predicts that diversity should peak at intermediate levels of disturbance due to trade-offs  
81 between species' ability to compete, colonize ecological niches, and tolerate disturbance. The  
82 IDH has been influential in ecological theory, as well as in management and conservation  
83 (32), but its predictions do not always hold true (27, 33). For example, in soil and freshwater  
84 bacterial communities different patterns of diversity were observed with increasing  
85 disturbance frequency with biomass destruction (34) and removal (35) as disturbance type,  
86 respectively. Meanwhile, the effect of varying frequencies of non-destructive disturbances on  
87 bacterial diversity remains unknown. Furthermore, the IDH predicts a pattern but it is not a  
88 coexistence mechanism as it was originally purported to be (36). Hence, its relevance is being  
89 debated (37, 38) with multiple interpretations and simplicity as the main points of critique. To  
90 date, the mechanisms behind the observed patterns of diversity under disturbance remain to  
91 be elucidated (39, 40).

92 The objective of this work was to test the effect of disturbance on the bacterial  
93 community structure, diversity, and ecosystem function of a complex bacterial system, with  
94 emphasis on the underlying assembly mechanisms. We employed sequencing batch  
95 bioreactors inoculated with activated sludge from an urban wastewater treatment plant, in a  
96 laboratory microcosm setup with varying frequencies of augmentation with toxic 3-  
97 chloroaniline (3-CA) as disturbance. Chloroanilines are toxic and carcinogenic compounds  
98 and few bacteria encode the pathways to degrade 3-CA (41), which is also known to inhibit  
99 both organic carbon removal and nitrification in sludge reactors (42). Microcosm studies are  
100 useful models of natural systems (43), can be coupled with theory development to stimulate  
101 further research (44), and by permitting easier manipulation and replication can allow  
102 inference of causal relationships (45) and statistically significant results (46).

103 We analyzed changes in ecosystem function over time by measuring removal of organic  
104 carbon, ammonia, and 3-CA, as well as biomass. Changes in community structure were

105 examined at different levels of resolution using a combination of metagenomics sequencing  
106 and 16S rRNA gene fingerprinting techniques. We also explored how diversity was related to  
107 function, focusing on tradeoffs. Furthermore, the role of stochasticity on community  
108 assembly was investigated by employing null model techniques from ecology.

109

## 110 **Results**

### 111 *Overall community dynamics and differentiation of clusters*

112 Bacterial community structure displayed temporal changes and varied between  
113 disturbance levels (Fig. 1). Constrained ordination showed a defined cluster separation with  
114 0% misclassification error of the outermost levels L0 and L7 from the remaining intermediate  
115 levels L1-6 (Fig. 1A). Overall community structure differed over time with a dispersion  
116 effect after 14 days (Fig. 1B). Levels across disturbance and time factors showed significant  
117 differences (PERMANOVA  $P = 0.003$ , Table S1), with a non-significant interaction effect ( $P$   
118  $= 0.15$ ). Disturbance was the factor responsible for the observed clustering (Fig. 1A),  
119 independent of dispersion heterogeneity (PERDIMSP  $P = 0.35$ ).

### 120 *Ecosystem function dynamics and trade-offs*

121 The undisturbed community (L0) was the only one with complete organic carbon  
122 removal and nitrification, while the press-disturbed community (L7) was the only one that  
123 could never nitrify and also had the lowest biomass (Fig. 3). Initially, reactors at the disturbed  
124 levels showed an inability to remove all of the 3-CA (with the exception of L1). Such lack of  
125 3-CA degradation was accompanied by a reduction in organic carbon removal in the first  
126 three weeks (Fig. 2A, Fig. S3A-C), and a complete inhibition of nitrification with subsequent  
127 accumulation of ammonium (Fig. 2B, Fig. S3F-H). Removal of 3-CA recovered and was  
128 above 95% for all disturbed levels after 28 days (Fig. S3D), but COD removal was still not  
129 100% despite complete 3-CA removal towards the end of the experiment (Figure 2C).

130 Nitrification was detected on day 21 for L1 and later for other disturbance levels, except  
131 for the press-disturbed L7. The dominant NO<sub>x</sub> component was nitrite, but some nitrate was  
132 also produced (Fig. 2D, Fig. S2H-J). At the end of the study, there was a strong negative  
133 correlation between organic carbon removal and nitrification (Fig. S3A-B) in terms of nitrite  
134 production ( $r = -0.982$ ,  $P = 0.003$ ) and nitrate production ( $\rho = -0.697$ ,  $P = 0.003$ ). Biomass  
135 values on day 35 differed significantly among levels with the highest value at L1 and the  
136 lowest at L7 (Fig. 2C). There was a strong negative correlation between biomass and organic  
137 carbon removal ( $r = -0.418$ ,  $P = 0.042$ ), and positive between biomass and partial nitrification  
138 to nitrite ( $r = 0.488$ ,  $P = 0.022$ ) (Fig. S3C-E).

#### 139 *Intermediate levels of disturbance displayed increased dissimilarity with time*

140 To distinguish the effect of disturbance from temporal community dynamics (Fig. 1),  
141 community assembly was assessed at each time point by ordination analysis using PCO (Fig.  
142 3A-B), NMDS, and CAP with cluster similarity analysis (Fig. S4). The combination of  
143 constrained and unconstrained ordination methods allowed differentiating location from  
144 dispersion effects in community assembly (47). L0 was consistently different in all ordination  
145 plots and L7 differed after 21 days, both with 0% misclassification error at all time points for  
146 CAP plots. Dispersion effects within intermediate levels were evident in the unconstrained  
147 ordination plots with higher differentiation of biological replicates after 35 days (Fig. 3B),  
148 coinciding with the production of nitrite and low levels of nitrate (Fig. 2D). Community  
149 differentiation was statistically significant from day 21 onwards as supported by multivariate  
150 tests (Table S1).

#### 151 *Metagenomics community analysis validates observations from fingerprint dataset*

152  $\beta$ -diversity patterns observed from 16S rRNA gene amplicon T-RFLP data on day 35  
153 were significantly similar to those from shotgun metagenomics data. A Mantel test on Bray-

154 Curtis distance matrixes for both datasets ( $n = 24$ ) yielded significant similarity ( $r = 0.73$ ,  $P =$   
155  $0.002$ ). Procrustes tests of comparisons within ordination methods of PCO (Fig. 3C) and  
156 NMDS also yielded significant similarities for both datasets ( $P = 0.002$ , Table S1).  
157 Multivariate PERMANOVA tests on the metagenomics dataset produced statistically  
158 significant results, but with significant heteroscedasticity as shown by PERMDISP (Table  
159 S1). We resolved these mean-variance relationship concerns by running a General Linear  
160 Multivariate Models (GLMMs) test to fit the data to a negative binomial distribution. Both  
161 residuals vs fitted and mean-variance plots supported the choice of a negative binomial  
162 distribution for the regression model (Fig. S5). The analysis of deviance of the regression  
163 rejected the null hypothesis of no difference between communities at different disturbance  
164 levels, independent of heteroscedasticity ( $p = 0.0149$ ).

#### 165 *Higher $\alpha$ -diversity for intermediately disturbed treatments and its trade-offs with function*

166 The observed patterns in  $\alpha$ -diversity were time dependent, as diversity decreased over  
167 time with respect to the initial sludge inoculum (Fig. 4A). Such temporal decrease in diversity  
168 was higher at the extreme ends of the disturbance range, resulting in a parabolic pattern on  
169 day 35 (Fig. 4B-C). The final  $\alpha$ -diversity pattern based on Hill number  ${}^2D$  was similar for  
170 both T-RFLP and Metagenomics methods (Fig. 4B), although the latter showed higher  
171 variability. For the metagenomics dataset we also calculated the lower-order Hill numbers  
172 ( ${}^0D$ ,  ${}^1D$ ) which give higher weight to less abundant OTUs. They displayed the same parabolic  
173 pattern (Fig. 4C). Welch's ANOVA tests were statistically significant for all Hill numbers ( $P$   
174  $< 0.01$ ,  $P = 0.022$  for  ${}^2D_{\text{Metagenomics}}$ ). Additionally, there were strong correlations between  $\alpha$ -  
175 diversity and community function (Fig. S6), focusing on the more robust estimators of  
176 microbial diversity  ${}^1D$  and  ${}^2D$  (48). Both  ${}^1D$  and  ${}^2D$  correlated positively with nitrification  
177 and biomass productivity ( $r > 0.44$ ,  $P < 0.03$ ), but negatively with organic carbon removal ( $r$   
178  $< -0.45$ ,  $P < 0.03$ ).



179 *Null model analyses validate variations in  $\beta$ -diversity and temporal increase in stochastic*  
180 *community assembly*

181 To test if the observed changes in  $\beta$ -diversity (Fig. 1A, Fig. 3) were due to underlying  
182 stochastic and deterministic mechanisms or due to changes in  $\alpha$ - and  $\gamma$ -diversity ratios ( $\alpha:\gamma$ )  
183 alone (49), we employed a null model analysis on the bacterial genus-level metagenomics  
184 and T-RFLP datasets on day 35 (Fig. 5A). Linear regression analyses between the calculated  
185  $\beta$ -deviation and the observed  $\gamma$ -diversity yielded non-significant results ( $P_{\text{Metagenomics}} = 0.42$ ,  
186  $P_{\text{T-RFLP}} = 0.31$ ), confirming that observed changes in  $\beta$ -diversity were not only due to changes  
187 in  $\alpha:\gamma$ .

188 Furthermore, another null model analysis was employed to test whether the increase in  
189 community dissimilarity observed over time (Fig. 1B, Fig. 3) was related to an increase in  
190 stochastic effects driving community assembly. A temporal analysis on the T-RFLP  
191 community dataset ( $n = 96$ ) employing the Raup-Crick dissimilarity metric (50, 51) showed  
192 that communities became closer to the null expectation over time, with the greater effect of  
193 stochasticity observed after 35 days (Fig. 5B). The observed differential heteroscedasticity  
194 among disturbance levels was statistically significant (PERMDISP  $P = 0.003$ ).

195

## 196 **Discussion**

197 *Deterministic and stochastic patterns of assembly amongst different disturbance levels*

198 Niche-structuring at both ends of the disturbance range was suggested by community  
199 assembly patterns and ecosystem function. The undisturbed (L0) and press-disturbed (L7)  
200 levels were distinct from each other as well as from the remaining intermediate levels, as  
201 supported by multivariate tests (both distance-based and GLMMs). The ordination plots and  
202 cluster analyses showed a clear separate clustering for the independent replicates of these two  
203 disturbance levels along the experiment, and particularly the constrained ordination plots

204 displayed this with 0% misclassification error. Furthermore, community function was clearly  
205 differentiated between L0 and L7, as well as being consistent across replicates at each level.  
206 We contend that the observed clustering is an indication that both the undisturbed and press-  
207 disturbed levels favoured deterministic assembly mechanisms, where the selective pressure  
208 due to unaltered succession (L0) or sustained toxic-stress (L7) promoted species sorting  
209 resulting in similar community structuring among biological replicates over the course of the  
210 experiment.

211 Conversely, the communities from intermediately disturbed levels (L1-6) did not form  
212 distinct clusters for any particular level through the experiment. Within-treatment  
213 dissimilarity among same-level replicates increased over time, with some replicates being  
214 more similar to those of other intermediate levels. Concurrently, ecosystem function  
215 parameters also displayed within-treatment variability for L1-6. For example, the conversion  
216 of ammonia to NO<sub>x</sub> products, which was initially hampered when communities were still  
217 adapting to degrade 3-CA, was not the same across all equally handled independent  
218 replicates. The observed divergence across independent replicates is considered here as  
219 strong indicator of stochasticity in community assembly. Other aspects might promote  
220 stochastic assembly, like strong feedback processes (52) that are linked to density  
221 dependence and species interactions (53), priority effects (3), and ecological drift (54).  
222 Nonetheless, the observed increasing role of stochasticity over time was also supported by  
223 null model analyses, which also validated that the observed changes in  $\beta$ -diversity were not  
224 due to changes in  $\alpha$ : $\gamma$  diversity ratios alone (49).

225 We argue that there were different underlying neutral-niche mechanisms operating in  
226 the resulting community assembly along the disturbance range of our study. Similarly, a  
227 study on groundwater microbial communities (6) found through null model analysis that both  
228 deterministic and stochastic processes played important roles in controlling community

229 assembly and succession, but their relative importance was time dependent. The greater role  
230 of stochasticity we found on day 35 concurred with higher observed variability in community  
231 function and structure among replicates for intermediately-disturbed levels. Likewise,  
232 previous work on freshwater ponds tracking changes in producers and animals (51) found  $\beta$ -  
233 diversity (in terms of dissimilarity) increasing with stochastic processes. These observed  
234 patterns are also in accordance with ecological studies proposing deterministic and stochastic  
235 processes balancing each other to allow coexistence (12), with communities exhibiting  
236 variations in the strength of stabilization mechanisms and the degree of fitness equivalence  
237 among species (11). Thus, it is not sufficient to ask whether communities mirror either  
238 stochastic or deterministic processes (10), but also necessary to investigate the combination  
239 of such mechanisms that in turn explain the observed community structures along a  
240 continuum (11).

#### 241 *Diversity-disturbance patterns and trade-offs with function*

242 We observed the highest  $\alpha$ -diversity at intermediate levels as predicted by the IDH (31),  
243 both in terms of composition ( ${}^0D$ ) and abundances ( ${}^1D$ ,  ${}^2D$ ). This finding is non-trivial in two  
244 aspects. First, Svensson *et al.* (32) have shown that most studies find support for the IDH  
245 when using species richness ( ${}^0D$ ) rather than evenness or other abundance-related indices  
246 (like  ${}^1D$  and  ${}^2D$ ). They called for the use of logical arguments to support the idea that peaks in  
247 compound diversity-indices should be also expected at intermediate levels of disturbance.  
248 Second, the use of richness for microbial communities is not reliable (48) since it is heavily  
249 constrained by the method of measurement (55), which makes it hard to compare results from  
250 different studies using this metric. Hence, for microbial systems, it is more reasonable to  
251 assess diversity in terms of more robust compound indices rather than richness, reason why  
252 we focused on  ${}^1D$  and  ${}^2D$  for diversity-function analyses.

253           Importantly, the observed pattern in  $\alpha$ -diversity was time dependent and resulted in an  
254 IDH pattern after 35 days. Temporal dynamics were expected since the sludge community  
255 experienced an initial perturbation in all reactors after transfer from a wastewater treatment  
256 plant to our microcosm arrangement. For the sludge inoculum this implied changes in reactor  
257 volume, frequency of feeding (continuous to batch), type of feeding (sewage to complex  
258 synthetic media), immigration rates (open to closed system), and mean cell residence time  
259 (low to high). This was a succession scenario in which communities had to adapt to such  
260 changes along with the designed disturbance array. For L0 and L7,  $^2D$  decreased over time in  
261 agreement with niche-dominated processes, probably because such levels represented the  
262 most predictable environments within our disturbance range. In contrast, intermediate levels  
263 either increased or maintained the same  $^2D$  over time (after an initial decrease within the first  
264 two weeks), seemingly a case where niche overlap promoted stochastic assembly (10). The  
265 emergence of a IDH pattern after time is coherent with findings in previous microcosm  
266 studies using synthetic protist (56) and freshwater enrichment (35) microbial communities.  
267 Yet, none of these studies evaluated the relative importance of the underlying assembly  
268 mechanisms of assembly on the observed diversity dynamics.

269           Additionally, both  $^1D$  and  $^2D$  were positively correlated with nitrification and  
270 productivity, suggesting that higher community evenness favours functionality under  
271 selective pressure (57), but were negatively correlated with organic carbon removal. Thus, we  
272 cannot affirm that more diverse communities have better functionality without considering  
273 tradeoffs. This supports the notion that higher  $\alpha$ -diversity does not necessarily imply a  
274 “better” or “healthier” system (55). In addition to the observed OTU diversity, there was an  
275 evident ecosystem function diversity along the disturbance range studied, a similar finding to  
276 that of previous studies with simpler planktonic communities (58).

277 Functional tradeoffs are expected under disturbance since organisms need to allocate  
278 resources normally used for other functions to recover after a disturbance (59). In our study,  
279 communities with higher biomass had lower organic carbon removal efficiencies, which  
280 together with the tradeoffs described for nitrification, suggest the adoption of different  
281 community life-history strategies depending on the frequency of disturbance. The results  
282 presented here were all taxonomy-independent since our focus was on diversity, function, and  
283 mechanisms of community assembly (phylum-level community changes are provided as  
284 supplemental material Fig. S7). Taxonomy-independent approaches continue to be useful to  
285 describe diversity patterns and mechanisms of community assembly (2, 60). However, it has  
286 been proposed that species' traits can predict the effects of disturbance and productivity on  
287 diversity (61). Hence, further analysis of the different taxa and their genetic potential paired  
288 with the observed tradeoffs in community function will aid in the understanding of potential  
289 life-history strategies (59) and their relationship with community aggregated traits (62) in the  
290 near future.

291 *Merging mechanisms of community assembly and alpha-diversity patterns: an intermediate*  
292 *stochasticity hypothesis*

293 Knowing that the validity of the IDH is still under debate (37, 38) and that many  
294 different diversity-disturbance patterns have been reported (27, 30, 33), we asked whether  
295 there is a relationship between the peaked pattern in diversity observed and the underlying  
296 neutral-niche processes of community assembly. Under purely neutral processes, diversity  
297 should vary randomly as all species have equal fitness (63), unless some other mechanism  
298 acts to prevent this. We hypothesized that higher  $\alpha$ -diversity at intermediate disturbance  
299 frequencies is the result of weaker stabilizing mechanisms (niches), which are stronger at  
300 extreme ends of the disturbance range. Neutral (stochastic) mechanisms will produce even  
301 assemblages (higher  $\alpha$ -diversity) at intermediately disturbed levels, whilst infrequent or too-

302 frequent disturbances will favour some species over others (lower  $\alpha$ -diversity). We propose  
303 this idea as the Intermediate Stochasticity Hypothesis (ISH, Fig. 6) and contend that it should  
304 hold particularly for compound  $\alpha$ -diversity indices (48), since the underlying assembly  
305 mechanisms would affect taxa abundance distributions.

306 It is recognized that, beyond empirical pattern description, an understanding of the  
307 underlying mechanisms is necessary to comprehend the outcomes of intermediate disturbance  
308 regimes (30, 40, 64). Furthermore, microbes constitute a special case since they evolve  
309 quickly, compared with plants and animals microbial turnover is rapid, and selection can  
310 cause very rapid shifts in community structure (65, 66). The complementary role of  
311 stochastic-niche processes could then be one of the key substantive issues promoting species  
312 coexistence (37, 39). This can foster research on disturbance-diversity-relationships by  
313 complementing the already proposed modifications to the competition-colonization tradeoffs  
314 under succession on which the IDH was originally based (31, 38), like considering effects of  
315 competitive exclusion (56, 67), productivity (68, 69), spatial heterogeneity (70), feedbacks  
316 between diversity and disturbance (71), and type of  $\alpha$ -diversity metric employed (32).

### 317 *Implications and concluding remarks*

318 The implications of this study relate to both process engineering and environmental  
319 management. Sludge communities within wastewater treatment are not only model systems in  
320 microbial ecology (72), but also a key driver for water sanitation and the environmental  
321 impact of anthropogenic water discharges (73). Disturbances could promote stochastic  
322 assemblages of the sludge communities, which despite harbouring higher diversity could lead  
323 to variable overall community function. This could be the reason why after similar  
324 perturbations the process outcomes differ, causing operational problems for water utilities  
325 (74). Furthermore, cases where disturbance temporally favours stochastic assembly could

326 lead to a different final community after the perturbation (29), which could compromise the  
327 expected ecosystem function. More research is needed to identify such scenarios in practice.

328 We described how different frequencies of disturbance affected ecosystem function and  
329 bacterial community diversity and assembly. Communities were assessed through different  
330 molecular methods that nonetheless yielded very similar patterns. Furthermore, besides the  
331 wastewater treatment microbial community, other complex microbial systems (e.g. gut  
332 microbiome) might display similar responses to disturbance. We argue that changes not only  
333 in diversity but also in the underlying deterministic-stochastic assembly mechanisms should  
334 be evaluated in studies of the effects of disturbance on such systems. For such an assessment,  
335 both replication and wide-enough disturbance ranges are key. This calls for more studies in  
336 microcosm (45, 75) and mesocosm settings, as well as meta-analysis from full-scale  
337 application studies.

338 Finally, the ISH could conceptually predict bacterial community shifts in diversity and  
339 ecosystem function, given a range of possible disturbance types, in a well-replicated time-  
340 series experiment, like it did in this study. Since microbes drive the Earth's biogeochemical  
341 cycles (76), its potential application in biodiversity conservation efforts and the built  
342 environment, should encourage further testing under different disturbance dimensions and  
343 microbial systems.

344

## 345 **Materials and Methods**

### 346 *Experimental design*

347 We employed sequencing batch microcosm bioreactors (20-mL working volume)  
348 inoculated with activated sludge from a full-scale plant (Text S1) and operated for 35 days.  
349 The daily complex synthetic feed included toxic 3-CA at varying frequencies. Eight levels of  
350 disturbance were set in triplicate independent reactors ( $n = 24$ ), which received 3-CA every

351 day (press-disturbed), every two, three, four, five, six, or seven days (intermediately-  
352 disturbed), or never (undisturbed). Level numbers were assigned from 0 to 7 (0 for no  
353 disturbance, 1 to 7 for low to high disturbance frequency, Fig. S1). Ecosystem function, in the  
354 form of process performance parameters, was measured weekly in accordance with Standard  
355 Methods (77) where appropriate, and targeted chemical oxygen demand (COD), nitrogen  
356 species (ammonium, nitrite, and nitrate ions), volatile suspended solids (VSS), and 3-CA. On  
357 the initial day and from the second week onwards, sludge samples (1 mL) were collected  
358 weekly for DNA extraction.

### 359 *Microbial community analysis and statistical tests*

360 All reported p-values for statistical tests in this study were corrected for multiple  
361 comparisons using a False Discovery Rate (FDR) of 10% (78). Community assembly was  
362 assessed by a combination of ordination methods (PCO, NMDS, CAP) and multivariate tests  
363 (PERMANOVA, PERMDISP) (79) on Bray-Curtis dissimilarity matrixes constructed from  
364 square-root transformed normalized abundance data using PRIMER (v.7). Additionally,  
365 general linear multivariate models (GLMMs), which deal with mean-variance relationships  
366 (80), were employed using the *mvabund* R package (81) fitting the metagenomics dataset to a  
367 negative binomial distribution, to ensure that the observed differences among groups were  
368 due to disturbance levels and not heteroscedasticity. The 500 most abundant genera (97% of  
369 total reads abundances) were employed to ensure random distribution of residuals fitted in the  
370 model. Significance was tested using the *anova* function in R with PIT-trap bootstrap  
371 resampling ( $n = 999$ ) (82). Hill diversity indices (83) were employed to measure  $\alpha$ -diversity  
372 as described elsewhere (48, 84), and calculated for normalized non-transformed relative  
373 abundance data (Text S1).

374 Abundance data from Terminal Restriction Fragment Length Polymorphism (T-RFLP)  
375 analysis of the bacterial 16S rRNA gene (using 530F-1050R primer set targeting V4-V5



376 regions) were employed in combination with shotgun metagenomics sequencing at the genus  
377 taxonomic level. Such an approach is valid for the questions asked in this study, since  
378 comparisons between NGS and fingerprinting techniques support the use of T-RFLP to detect  
379 meaningful community assembly patterns and correlations with environmental variables (60),  
380 and such patterns can be validated by NGS on a subset of the fingerprinting dataset (2).

### 381 *Comparison between Metagenomics and T-RFLP community datasets*

382 Mantel and Procrustes tests (85) were applied to compare metagenomics and T-RFLP  
383 datasets from all bioreactors on day 35 (n = 24, subsample of the full T-RFLP dataset).  
384 Briefly, Bray-Curtis dissimilarity matrixes were computed using square root transformed T-  
385 RFLP data and bacterial genus-level taxa tables generated using a metagenomics approach.  
386 Mantel tests were then used to determine the strength and significance of the Pearson  
387 product-moment correlation between complete dissimilarity matrices. Procrustes tests  
388 (PROTEST) were also employed as an alternative approach to Mantel tests in order to  
389 compare and visualize both matrices on PCO and NMDS ordinations. The resultant m2-value  
390 is a statistic that describes the degree of concordance between the two matrices evaluated  
391 (86). All these statistical tests were performed using the *vegan* R package (functions:  
392 *procuste, mantel, metaMDS, vegdist*).

### 393 *Metagenomics sequencing and reads processing*

394 Around 173 million paired-end reads were generated in total and  $7.2 \pm 0.7$  million  
395 paired-end reads on average per sample. Illumina adaptors, short reads, low quality reads or  
396 reads containing any ambiguous base were removed using cutadapt (-m 50 -q 20 --max-n 0,  
397 v.1.11) (87). Taxonomic assignment of metagenomics reads was done following the method  
398 described by Ilott *et al.* (88). High quality reads ( $99.2 \pm 0.09\%$  of the raw reads) were  
399 randomly subsampled to an even depth of 12,395,400 for each sample prior to further

400 analysis. They were aligned against the NCBI non-redundant (NR) protein database (March  
401 2016) using DIAMOND (v.0.7.10.59) with default parameters (89). The lowest common  
402 ancestor approach implemented in MEGAN Community Edition v.6.5.5 (90) was used to  
403 assign taxonomy to the NCB-NR aligned reads with the following parameters:  
404 maxMatches=25, minScore=50, minSupport=20, paired=true. On average, 48.2% of the high-  
405 quality reads were assigned to cellular organisms, from which in turn 98% were assigned to  
406 the bacterial domain. Adequacy of sequencing depth was corroborated with rarefaction  
407 curves at the genus taxonomy level using MEGAN (90). We did not include genotypic  
408 information because it was outside the scope of our study, but will do so in future  
409 investigations arising from this work.

#### 410 *Null Model Analyses on Diversity*

411  $\beta$ -diversity is normally seen as the variation in composition of communities among sites  
412 (91), although there are several definitions for it (92). It is also known that most changes in  $\beta$ -  
413 diversity are determined by variation in the ratio of local ( $\alpha$ ) and regional ( $\gamma$ ) diversity. Thus,  
414 to disentangle the roles of stochastic and deterministic processes as drivers of change in  $\beta$ -  
415 diversity it is necessary to incorporate statistical null models in the analysis (51, 91), which  
416 assume that species interactions are not important for community assembly (93). We  
417 employed two null model approaches previously tested in community ecology (49, 51), and  
418 more recently for microbial communities (6). To adapt them to handle microbial community  
419 data, we considered species as OTUs (i.e. genus for metagenomics and T-RFs for T-RFLP  
420 datasets) and each individual count as one read within the metagenomics dataset, or one  
421 peak-area unit within the T-RFLP dataset. The first null model approach used here, originally  
422 applied to woody plants (49), randomizes the location of each individual within the three  
423 independent reactors for each of the eight disturbance treatment levels, while maintaining  $\gamma$ -  
424 diversity, the total quantity of individuals per reactor, and the relative abundance of each

425 OTU. The second null model uses a modified Raup-Crick dissimilarity metric ( $\beta_{RC}$ ), which  
426 indicates the degree to which the observed number of shared OTUs between any two  
427 communities deviates from the expected number of shared OTUs in the null model. The  
428 closer to the null expectation, the stronger the stochastic effects on the community assembly  
429 are, and vice versa (51). This method is robust for variation in  $\alpha$ -diversity among  
430 communities.

### 431 **Sequence data and metadata**

432 The microbial DNA metagenomics sequencing datasets supporting the results in this  
433 article is available at NCBI BioProjects with accession number: 389377.

### 434 **Acknowledgements**

435 This research was supported by the Singapore National Research Foundation and Ministry of  
436 Education under the Research Centre of Excellence Program. We thank C.W. Liew for help  
437 with sludge sampling, C.F. Liew for technical assistance with the ABI 3730XL DNA  
438 analyzer, and S.R. Lohar for the library preparations for metagenomics. F. Lauro, R.B.H.  
439 Williams, and S. Kjelleberg are acknowledged for their comments on an earlier version of the  
440 manuscript. We thank M. Holyoak for his critical and detailed feedback, as well as E. M.  
441 Marzinelli for discussions on data transformations and GLMMs. E.S. was partially supported  
442 by a Fulbright fellowship.

443 **References:**

- 444 1. **Stegen JC, Lin XJ, Fredrickson JK, Chen XY, Kennedy DW, Murray CJ, et al.**  
445 2013. Quantifying community assembly processes and identifying features that impose them.  
446 *ISME J* **7**:2069-2079.
- 447 2. **Powell JR, Karunaratne S, Campbell CD, Yao H, Robinson L, Singh BK.** 2015.  
448 Deterministic processes vary during community assembly for ecologically dissimilar taxa.  
449 *Nat Commun* **6**:1-10.
- 450 3. **Zhou J, Ning D.** 2017. Stochastic Community Assembly: Does It Matter in Microbial  
451 Ecology? *Microbiol Mol Biol Rev* **81**:1-32.
- 452 4. **Mouillot D, Graham NAJ, Vileger S, Mason NWH, Bellwood DR.** 2013. A  
453 functional approach reveals community responses to disturbances. *Trends Ecol Evol* **28**:167-  
454 177.
- 455 5. **Briones A, Raskin L.** 2003. Diversity and dynamics of microbial communities in  
456 engineered environments and their implications for process stability. *Curr Opin Biotechnol*  
457 **14**:270-276.
- 458 6. **Zhou JZ, Deng Y, Zhang P, Xue K, Liang YT, Van Nostrand JD, et al.** 2014.  
459 Stochasticity, succession, and environmental perturbations in a fluidic ecosystem. *Proc Natl*  
460 *Acad Sci USA* **111**:E836-E845.
- 461 7. **Griffin JS, Wells GF.** 2017. Regional synchrony in full-scale activated sludge  
462 bioreactors due to deterministic microbial community assembly. *ISME J* **11**:500-511.
- 463 8. **Rosindell J, Hubbell SP, Etienne RS.** 2011. The Unified Neutral Theory of  
464 Biodiversity and Biogeography at Age Ten. *Trends Ecol Evol* **26**:340-348.
- 465 9. **Silvertown J.** 2004. Plant coexistence and the niche. *Trends Ecol Evol* **19**:605-611.
- 466 10. **Gravel D, Canham CD, Beaudet M, Messier C.** 2006. Reconciling niche and  
467 neutrality: the continuum hypothesis. *Ecol Lett* **9**:399-409.
- 468 11. **Adler PB, HilleRisLambers J, Levine JM.** 2007. A niche for neutrality. *Ecol Lett*  
469 **10**:95-104.
- 470 12. **Vergnon R, Dulvy NK, Freckleton RP.** 2009. Niches versus neutrality: uncovering  
471 the drivers of diversity in a species-rich community. *Ecol Lett* **12**:1079-1090.
- 472 13. **Chase JM, Myers JA.** 2011. Disentangling the importance of ecological niches from  
473 stochastic processes across scales. *Philosophical Transactions of the Royal Society B-*  
474 *Biological Sciences* **366**:2351-2363.
- 475 14. **Fisher CK, Mehta P.** 2014. The transition between the niche and neutral regimes in  
476 ecology. *Proceedings of the National Academy of Sciences* **111**:13111-13116.
- 477 15. **Ofiteru ID, Lunn M, Curtis TP, Wells GF, Criddle CS, Francis CA, et al.** 2010.  
478 Combined niche and neutral effects in a microbial wastewater treatment community. *Proc*  
479 *Natl Acad Sci USA* **107**:15345-15350.
- 480 16. **Jeraldo P, Sipos M, Chia N, Brulc JM, Dhillon AS, Konkel ME, et al.** 2012.  
481 Quantification of the relative roles of niche and neutral processes in structuring  
482 gastrointestinal microbiomes. *Proc Natl Acad Sci USA* **109**:9692-9698.
- 483 17. **Pholchan MK, Baptista JD, Davenport RJ, Sloan WT, Curtis TP.** 2013. Microbial  
484 community assembly, theory and rare functions. *Front Microbiol* **4**:1-9.
- 485 18. **Dini-Andreote F, Stegen JC, van Elsas JD, Salles JF.** 2015. Disentangling  
486 mechanisms that mediate the balance between stochastic and deterministic processes in  
487 microbial succession. *Proc Natl Acad Sci USA* **112**:E1326-E1332.
- 488 19. **Caruso T, Chan YK, Lacap DC, Lau MCY, McKay CP, Pointing SB.** 2011.  
489 Stochastic and deterministic processes interact in the assembly of desert microbial  
490 communities on a global scale. *ISME J* **5**:1406-1413.
- 491 20. **Stegen JC, Lin XJ, Konopka AE, Fredrickson JK.** 2012. Stochastic and  
492 deterministic assembly processes in subsurface microbial communities. *ISME J* **6**:1653-1664.

- 493 21. **Wang JJ, Shen J, Wu YC, Tu C, Soininen J, Stegen JC, et al.** 2013. Phylogenetic  
494 beta diversity in bacterial assemblages across ecosystems: deterministic versus stochastic  
495 processes. *ISME J* **7**:1310-1321.
- 496 22. **Dumbrell AJ, Nelson M, Helgason T, Dytham C, Fitter AH.** 2010. Relative roles  
497 of niche and neutral processes in structuring a soil microbial community. *ISME J* **4**:337-345.
- 498 23. **Langenheder S, Szekely AJ.** 2011. Species sorting and neutral processes are both  
499 important during the initial assembly of bacterial communities. *ISME J* **5**:1086-1094.
- 500 24. **Lee JE, Buckley HL, Etienne RS, Lear G.** 2013. Both species sorting and neutral  
501 processes drive assembly of bacterial communities in aquatic microcosms. *FEMS Microbiol*  
502 *Ecol* **86**:288-302.
- 503 25. **Zhou JZ, Liu WZ, Deng Y, Jiang YH, Xue K, He ZL, et al.** 2013. Stochastic  
504 assembly leads to alternative communities with distinct functions in a bioreactor microbial  
505 community. *Mbio* **4**:1-8.
- 506 26. **Cain M, Bowman W, Hacker S.** *Ecology*. 3 ed. Sunderland, Massachusetts: Sinauer  
507 Associates Inc.; 2014.
- 508 27. **Mackey RL, Currie DJ.** 2001. The diversity-disturbance relationship: Is it generally  
509 strong and peaked? *Ecology* **82**:3479-3492.
- 510 28. **Shade A, Read JS, Youngblut ND, Fierer N, Knight R, Kratz TK, et al.** 2012.  
511 Lake microbial communities are resilient after a whole-ecosystem disturbance. *ISME J*  
512 **6**:2153-2167.
- 513 29. **Shade A, Peter H, Allison SD, Baho DL, Berga M, Burgmann H, et al.** 2012.  
514 Fundamentals of microbial community resistance and resilience. *Front Microbiol* **3**:1-19.
- 515 30. **Miller AD, Roxburgh SH, Shea K.** 2011. How frequency and intensity shape  
516 diversity-disturbance relationships. *Proc Natl Acad Sci USA* **108**:5643-5648.
- 517 31. **Connell JH.** 1978. Diversity in tropical rain forests and coral reefs. *Science*  
518 **199**:1302-1310.
- 519 32. **Svensson JR, Lindgarth M, Jonsson PR, Pavia H.** 2012. Disturbance–diversity  
520 models: what do they really predict and how are they tested? *Proceedings of the Royal*  
521 *Society B: Biological Sciences* **279**:2163-2170.
- 522 33. **Kershaw HM, Mallik AU.** 2013. Predicting Plant Diversity Response to  
523 Disturbance: Applicability of the Intermediate Disturbance Hypothesis and Mass Ratio  
524 Hypothesis. *Crit Rev Plant Sci* **32**:383-395.
- 525 34. **Kim M, Heo E, Kang H, Adams J.** 2013. Changes in Soil Bacterial Community  
526 Structure with Increasing Disturbance Frequency. *Microb Ecol* **66**:171-181.
- 527 35. **Gibbons SM, Scholz M, Hutchison AL, Dinner AR, Gilbert JA, Coleman ML.**  
528 2016. Disturbance Regimes Predictably Alter Diversity in an Ecologically Complex Bacterial  
529 System. *mBio* **7**:1-10.
- 530 36. **Roxburgh SH, Shea K, Wilson JB.** 2004. The intermediate disturbance hypothesis:  
531 Patch dynamics and mechanisms of species coexistence. *Ecology* **85**:359-371.
- 532 37. **Fox JW.** 2013. The intermediate disturbance hypothesis should be abandoned. *Trends*  
533 *Ecol Evol* **28**:86-92.
- 534 38. **Sheil D, Burslem D.** 2013. Defining and defending Connell's intermediate  
535 disturbance hypothesis: a response to Fox. *Trends Ecol Evol* **28**:571-572.
- 536 39. **Fox JW.** 2013. The intermediate disturbance hypothesis is broadly defined,  
537 substantive issues are key: a reply to Sheil and Burslem. *Trends Ecol Evol* **28**:572-573.
- 538 40. **Shea K, Roxburgh SH, Rauschert ESJ.** 2004. Moving from pattern to process:  
539 coexistence mechanisms under intermediate disturbance regimes. *Ecol Lett* **7**:491-508.
- 540 41. **Krol JE, Penrod JT, McCaslin H, Rogers LM, Yano H, Stancik AD, et al.** 2012.  
541 Role of IncP-1 beta plasmids pWDL7::rfp and pNB8c in chloroaniline catabolism as  
542 determined by genomic and functional analyses. *Appl Environ Microbiol* **78**:828-838.

- 543 42. **Falk MW, Wuertz S.** 2010. Effects of the toxin 3-chloroaniline at low concentrations  
544 on microbial community dynamics and membrane bioreactor performance. *Water Res*  
545 **44**:5109-5115.
- 546 43. **Jessup CM, Kassen R, Forde SE, Kerr B, Buckling A, Rainey PB, et al.** 2004. Big  
547 questions, small worlds: microbial model systems in ecology. *Trends Ecol Evol* **19**:189-197.
- 548 44. **Benton TG, Solan M, Travis JMJ, Sait SM.** 2007. Microcosm experiments can  
549 inform global ecological problems. *Trends Ecol Evol* **22**:516-521.
- 550 45. **Drake JM, Kramer AM.** 2012. Mechanistic analogy: how microcosms explain  
551 nature. *Theor Ecol* **5**:433-444.
- 552 46. **Prosser JJ.** 2010. Replicate or lie. *Environ Microbiol* **12**:1806-1810.
- 553 47. **Anderson MJ, Willis TJ.** 2003. Canonical analysis of principal coordinates: A useful  
554 method of constrained ordination for ecology. *Ecology* **84**:511-525.
- 555 48. **Haegeman B, Hamelin J, Moriarty J, Neal P, Dushoff J, Weitz JS.** 2013. Robust  
556 estimation of microbial diversity in theory and in practice. *ISME J* **7**:1092-1101.
- 557 49. **Kraft NJB, Comita LS, Chase JM, Sanders NJ, Swenson NG, Crist TO, et al.**  
558 2011. Disentangling the Drivers of  $\beta$  Diversity Along Latitudinal and Elevational Gradients.  
559 *Science* **333**:1755-1758.
- 560 50. **Chase JM, Kraft NJB, Smith KG, Vellend M, Inouye BD.** 2011. Using null models  
561 to disentangle variation in community dissimilarity from variation in  $\alpha$ -diversity. *Ecosphere*  
562 **2**:1-11.
- 563 51. **Chase JM.** 2010. Stochastic Community Assembly Causes Higher Biodiversity in  
564 More Productive Environments. *Science* **328**:1388-1391.
- 565 52. **Soto-Ortiz L.** 2015. The Regulation of Ecological Communities Through Feedback  
566 Loops: A Review. *Research in Zoology* **5**:1-15.
- 567 53. **Holyoak M, Loreau M.** 2006. Reconciling empirical ecology with neutral  
568 community models. *Ecology* **87**:1370-1377.
- 569 54. **Nemergut DR, Schmidt SK, Fukami T, O'Neill SP, Bilinski TM, Stanish LF, et**  
570 **al.** 2013. Patterns and Processes of Microbial Community Assembly. *Microbiol Mol Biol*  
571 *Rev* **77**:342-356.
- 572 55. **Shade A.** 2017. Diversity is the question, not the answer. *ISME J* **11**:1-6.
- 573 56. **Violle C, Pu ZC, Jiang L.** 2010. Experimental demonstration of the importance of  
574 competition under disturbance. *Proc Natl Acad Sci USA* **107**:12925-12929.
- 575 57. **Wittebolle L, Marzorati M, Clement L, Balloi A, Daffonchio D, Heylen K, et al.**  
576 2009. Initial community evenness favours functionality under selective stress. *Nature*  
577 **458**:623-626.
- 578 58. **Weithoff G, Walz N, Gaedke U.** 2001. The intermediate, disturbance hypothesis -  
579 species diversity or functional diversity? *J Plankton Res* **23**:1147-1155.
- 580 59. **Krause S, Le Roux X, Niklaus PA, Van Bodegom PM, Lennon JT, Bertilsson S,**  
581 **et al.** 2014. Trait-based approaches for understanding microbial biodiversity and ecosystem  
582 functioning. *Front Microbiol* **5**:1-10.
- 583 60. **van Dorst J, Bissett A, Palmer AS, Brown M, Snape I, Stark JS, et al.** 2014.  
584 Community fingerprinting in a sequencing world. *FEMS Microbiol Ecol* **89**:316-330.
- 585 61. **Haddad NM, Holyoak M, Mata TM, Davies KF, Melbourne BA, Preston K.**  
586 2008. Species' traits predict the effects of disturbance and productivity on diversity. *Ecol Lett*  
587 **11**:348-356.
- 588 62. **Fierer N, Barberan A, Laughlin DC.** 2014. Seeing the forest for the genes: using  
589 metagenomics to infer the aggregated traits of microbial communities. *Front Microbiol* **5**:1-6.
- 590 63. **Hubbell SP.** The unified neutral theory of biodiversity and biogeography.  
591 *Monographs in Population Biology*. 322001. p. i-xiv, 1-375.



- 592 64. **Huston MA.** 2014. Disturbance, productivity, and species diversity: empiricism vs.  
593 logic in ecological theory. *Ecology* **95**:2382-2396.
- 594 65. **Prosser JI, Bohannan BJM, Curtis TP, Ellis RJ, Firestone MK, Freckleton RP,**  
595 **et al.** 2007. The role of ecological theory in microbial ecology. *Nat Rev Microbiol* **5**:384-  
596 392.
- 597 66. **Hanson CA, Fuhrman JA, Horner-Devine MC, Martiny JBH.** 2012. Beyond  
598 biogeographic patterns: processes shaping the microbial landscape. *Nat Rev Microbiol*  
599 **10**:497-506.
- 600 67. **Huston M.** 1979. A General Hypothesis of Species Diversity. *The American*  
601 *Naturalist* **113**:81-101.
- 602 68. **Kassen R, Buckling A, Bell G, Rainey PB.** 2000. Diversity peaks at intermediate  
603 productivity in a laboratory microcosm. *Nature* **406**:508-512.
- 604 69. **Kondoh M.** 2001. Unifying the relationships of species richness to productivity and  
605 disturbance. *Proceedings of the Royal Society B: Biological Sciences* **268**:269-271.
- 606 70. **Buckling A, Kassen R, Bell G, Rainey PB.** 2000. Disturbance and diversity in  
607 experimental microcosms. *Nature* **408**:961-964.
- 608 71. **Hughes AR, Byrnes JE, Kimbro DL, Stachowicz JJ.** 2007. Reciprocal relationships  
609 and potential feedbacks between biodiversity and disturbance. *Ecol Lett* **10**:849-864.
- 610 72. **Daims H, Taylor MW, Wagner M.** 2006. Wastewater treatment: a model system for  
611 microbial ecology. *Trends Biotechnol* **24**:483-489.
- 612 73. **Tchobanoglous GB, Franklin L, Stensel HD.** *Wastewater Engineering: Treatment*  
613 *and Reuse* 4ed. Boston: McGraw Hill; 2003.
- 614 74. **Pholchan MK, Baptista JD, Davenport RJ, Curtis TP.** 2010. Systematic study of  
615 the effect of operating variables on reactor performance and microbial diversity in laboratory-  
616 scale activated sludge reactors. *Water Res* **44**:1341-1352.
- 617 75. **Altermatt F, Fronhofer EA, Garnier A, Giometto A, Hammes F, Klecka J, et al.**  
618 2015. Big answers from small worlds: a user's guide for protist microcosms as a model  
619 system in ecology and evolution. *Methods in Ecology and Evolution* **6**:218-231.
- 620 76. **Widder S, Allen RJ, Pfeiffer T, Curtis TP, Wiuf C, Sloan WT, et al.** 2016.  
621 Challenges in microbial ecology: building predictive understanding of community function  
622 and dynamics. *ISME J* **10**:2557-2568.
- 623 77. **APHA-AWWA-WEF.** *Standard Methods for the Examination of Water and*  
624 *Wastewater.* 22 ed. Washington D.C., USA: APHA-AWWA-WEF; 2005.
- 625 78. **Benjamini Y, Hochberg Y.** 1995. Controlling the False Discovery Rate: A Practical  
626 and Powerful Approach to Multiple Testing. *Journal of the Royal Statistical Society Series B*  
627 (Methodological) **57**:289-300.
- 628 79. **Clarke KR, Gorley RN.** *PRIMER v7: User Manual/Tutorial.* Plymouth, UK:  
629 *PRIMER-E*; 2015. 296 p.
- 630 80. **Warton DI, Wright ST, Wang Y.** 2012. Distance-based multivariate analyses  
631 confound location and dispersion effects. *Methods in Ecology and Evolution* **3**:89-101.
- 632 81. **Wang Y, Naumann U, Wright ST, Warton DI.** 2012. mvabund— an R package for  
633 model-based analysis of multivariate abundance data. *Methods in Ecology and Evolution*  
634 **3**:471-474.
- 635 82. **Warton DI, Thibaut L, Wang YA.** 2017. The PIT-trap—A “model-free” bootstrap  
636 procedure for inference about regression models with discrete, multivariate responses. *PLOS*  
637 *ONE* **12**:e0181790.
- 638 83. **Hill MO.** 1973. Diversity and evenness: a unifying notation and its consequences.  
639 *Ecology* **54**:427-432.

- 640 84. **Vuono DC, Benecke J, Henkel J, Navidi WC, Cath TY, Munakata-Marr J, et al.**  
641 2015. Disturbance and temporal partitioning of the activated sludge metacommunity. *ISME J*  
642 **9**:425-435.
- 643 85. **Peres-Neto PR, Jackson DA.** 2001. How well do multivariate data sets match? The  
644 advantages of a Procrustean superimposition approach over the Mantel test. *Oecologia*  
645 **129**:169-178.
- 646 86. **Jackson DA.** 1995. PROTEST: A PROcrustean Randomization TEST of community  
647 environment concordance. *Ecoscience* **2**:297-303.
- 648 87. **Chen C, Khaleel SS, Huang H, Wu CH.** 2014. Software for pre-processing Illumina  
649 next-generation sequencing short read sequences. *Source Code for Biology and Medicine*  
650 **9**:8-8.
- 651 88. **Hott NE, Bollrath J, Danne C, Schiering C, Shale M, Adelman K, et al.** 2016.  
652 Defining the microbial transcriptional response to colitis through integrated host and  
653 microbiome profiling. *ISME J*:2389-2404.
- 654 89. **Buchfink B, Xie C, Huson DH.** 2015. Fast and sensitive protein alignment using  
655 DIAMOND. *Nat Meth* **12**:59-60.
- 656 90. **Huson DH, Beier S, Flade I, Górska A, El-Hadidi M, Mitra S, et al.** 2016.  
657 MEGAN Community Edition - Interactive Exploration and Analysis of Large-Scale  
658 Microbiome Sequencing Data. *PLoS Comp Biol* **12**:e1004957.
- 659 91. **Anderson MJ, Crist TO, Chase JM, Vellend M, Inouye BD, Freestone AL, et al.**  
660 2011. Navigating the multiple meanings of beta diversity: a roadmap for the practicing  
661 ecologist. *Ecol Lett* **14**:19-28.
- 662 92. **Tuomisto H.** 2010. A diversity of beta diversities: straightening up a concept gone  
663 awry. Part 1. Defining beta diversity as a function of alpha and gamma diversity. *Ecography*  
664 **33**:2-22.
- 665 93. **Gotelli NJ, McGill BJ.** 2006. Null Versus Neutral Models: What's The Difference?  
666 *Ecography* **29**:793-800.



## 667 **Figure Legends**

668 **FIG 1** Ordination plots differentiating undisturbed (L0) and press-disturbed (L7) levels from  
669 intermediately disturbed levels (L1-6) and displaying temporal community dispersion effects  
670 for all time points. (A) Canonical Analysis of Principal coordinates (CAP, constrained  
671 ordination) plot, with disturbance levels as differentiation criteria, shows niche differentiation  
672 for L0 (CAP1 axis) and L7 (CAP2 axis). Disturbance levels: L0[▲], L1[▼], L2[◻], L3[◻], L4[◻]  
673 [◻], L5[+], L6[■], and L7[\*]. (B) Non-metric Multidimensional Scaling (NMDS,  
674 unconstrained ordination) shows dispersion effect after a given number of days. Days: 14[△],  
675 21[▽], 28[■], and 35[◆].

676 **FIG 2** Process performance indicators across disturbance levels. Effects include temporal  
677 changes and tradeoffs in community function. (A,C) Percentage of organic carbon as  
678 chemical oxygen demand (COD, ●) and 3-CA (◇) removal for all levels (negative values  
679 represent accumulation). (C) Biomass as volatile suspended solids. (VSS, ◻). (B,D)  
680 Concentration of ammonium (◆), nitrite (△), and nitrate (○) as nitrogen for all levels. Data  
681 are from days 7 (A-B) and 35 (C-D) of the study (for all time points sampled, see Fig. S2).  
682 Mean ± s.d. (n = 3) are shown. Undisturbed L0 replicates had consistent organic carbon  
683 removal and complete nitrification, whereas press-disturbed L7 never showed nitrification  
684 and had the lowest final biomass. Intermediate levels L1-6 displayed changing functionality  
685 with higher s.d. values that increased over time.

686 **FIG 3** Community assembly as assessed by Principal Coordinates Analysis (PCO) plots for  
687 all disturbance levels on T-RFLP datasets on days (A) 14 and (B) 35 of the study. Ovals with  
688 dashed lines represent 80% similarity calculated by group average clustering. Disturbance  
689 levels: L0 [▲], L1 [▼], L2 [◻], L3 [◻], L4 [■], L5 [+], L6 [■], and L7 [\*]. (C) Procrustes  
690 analysis on PCO at day 35 comparing metagenomics (circles) and T-RFLP (triangles)

691 datasets. Lines unite data points from the same reactor ( $n = 24$ ). Same colour palette as for  
692 disturbance levels. Tests comparing both methods were statistically significant (Table S1).  
693 Intermediate treatments' (L1-6) within-treatment dissimilarity increased with time. L0 and L7  
694 clusters consistently displayed higher similarity after 14 days.

695 **FIG 4**  $\alpha$ -diversity patterns based on T-RFLP and metagenomics data. (A) Temporal  
696 dynamics of Hill number  ${}^2D$  for abundant OTUs, calculated from T-RFLP data across  
697 disturbance levels. (B) Hill number  ${}^2D$  calculated from T-RFLP (black dashed bars) and  
698 metagenomics (grey solid bars) data at days 0 (seed) and 35. (C) Hill numbers  ${}^0D$  (black solid  
699 bars) and  ${}^1D$  (blue solid bars) from metagenomics data on days 0 (seed) and 35. Values  
700 represent mean  $\pm$  s.d. ( $n = 3$ ).

701 **FIG 5** Null model analyses of community data. (A)  $\beta$ -deviation versus observed  $\gamma$ -diversity  
702 for all disturbance treatment levels on day 35. Each point involved all replicates ( $n = 3$ ) of  
703 each disturbance level ( $a = 8$ ) using the model from (49) on the metagenomics (closed circles,  
704 bacterial genus taxonomical level), and T-RFLP (open squares) datasets. Non-significant  
705 linear regression tests confirmed that changes in  $\beta$ -diversity did not arise from changes in  $\alpha$ : $\gamma$   
706 diversity alone, suggesting other mechanisms underlying community assembly. (B) NMDS  
707 ordination plot of community dynamics of common OTUs (T-RFLP dataset,  $n = 96$ ) using  
708 the Raup-Crick dissimilarity metric as in (51). Days: 14[▲], 21[▼], 28[■], and 35[◆]. Lines  
709 denote the minimum convex shapes around the data for each disturbance level. Points that are  
710 further separated represent communities less deviant from the null expectation, whereas those  
711 that are closer together are more divergent from the null expectation. Communities on day 35  
712 are nearer to the null expectation compared with the ones on previous days, suggesting an  
713 increasing role over time of stochastic processes in driving community assembly. Overall,

714 null model analyses validate variations in  $\beta$ -diversity and temporal increase of stochastic  
715 community assembly

716 **FIG 6** Intermediate Stochasticity Hypothesis (ISH) for community assembly under varying  
717 disturbances. Conceptual representation of the classic relationship between  $\alpha$ -diversity and  
718 disturbance (31), including the effect of underlying stochastic and deterministic processes  
719 driving bacterial community assembly. When intermediate disturbance regimes result in less  
720 predictable environments, specialized traits would be advantageous to taxa, and the stochastic  
721 equalization of competitive advantages would lead to higher  $\alpha$ -diversity. On the contrary,  
722 extreme ends of the range where conditions are recurrent would select for adapted organisms  
723 whose dominance would result in a lower  $\alpha$ -diversity.

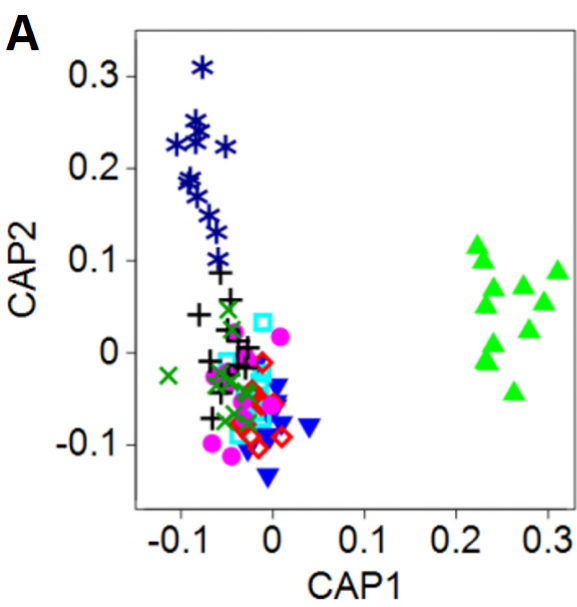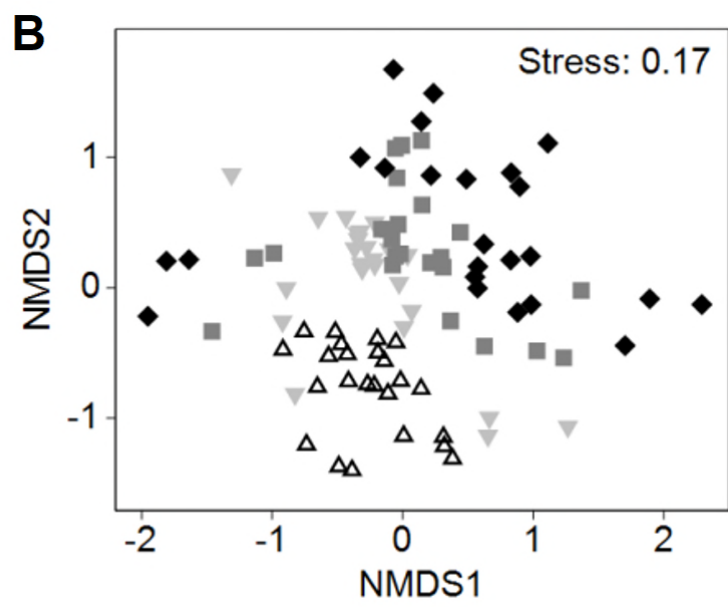

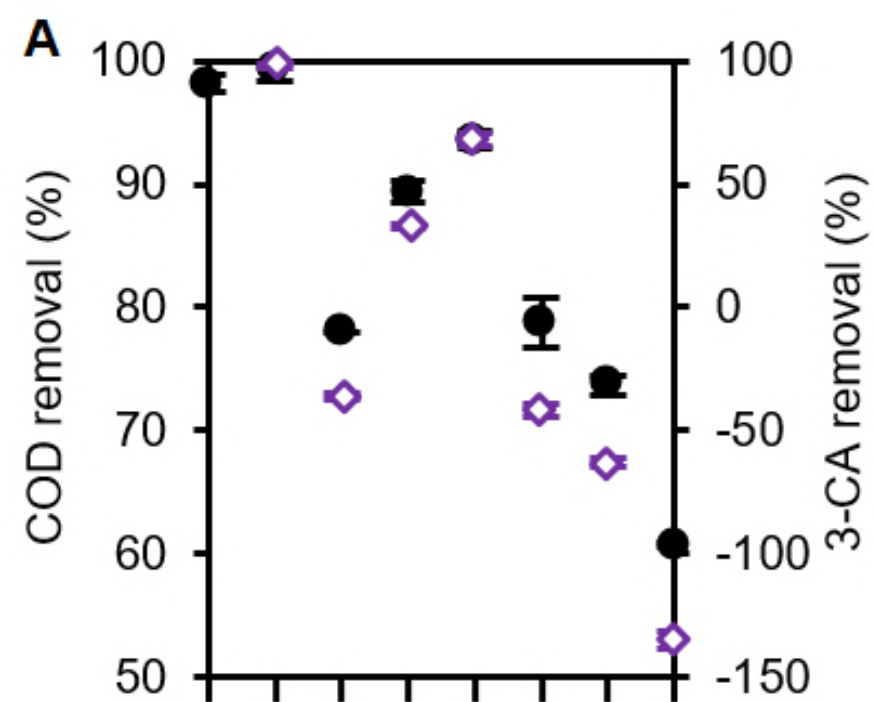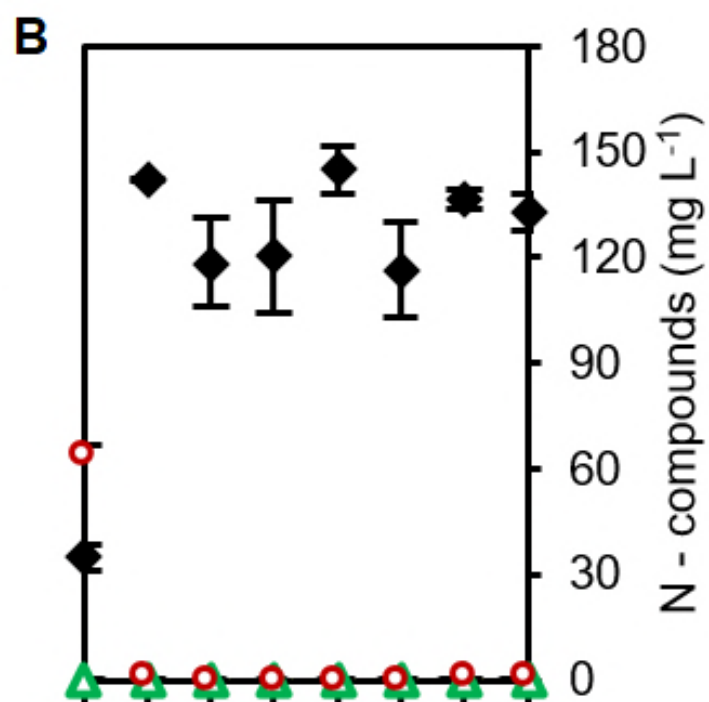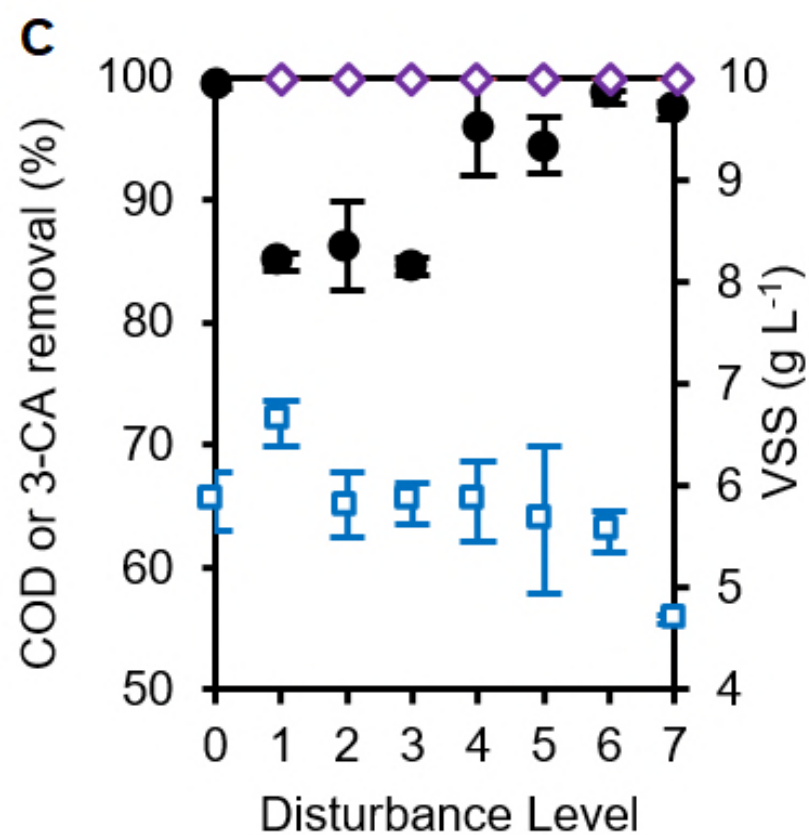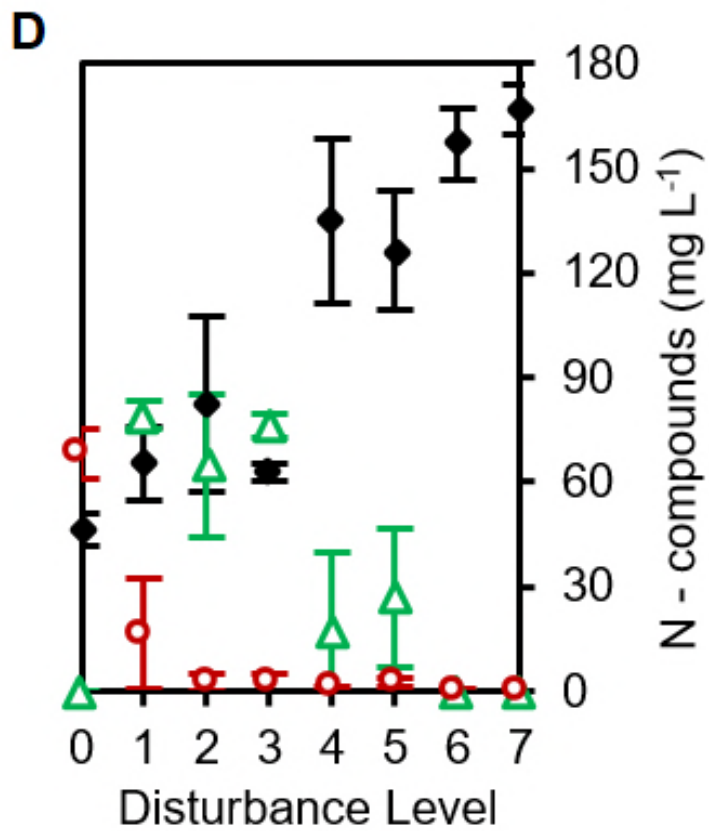

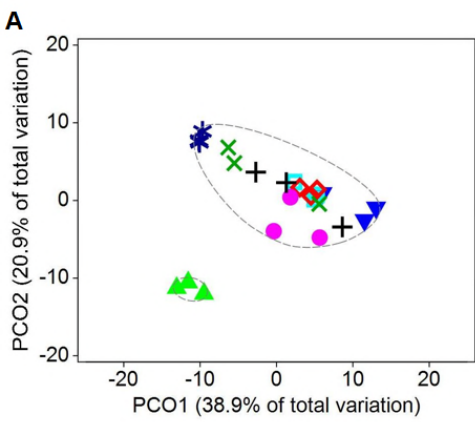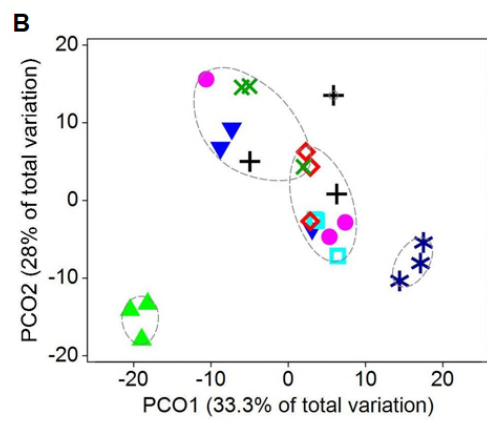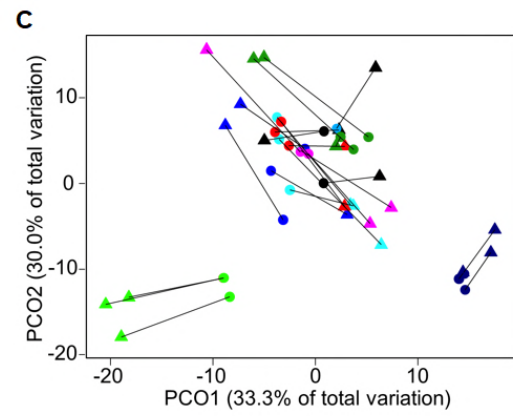

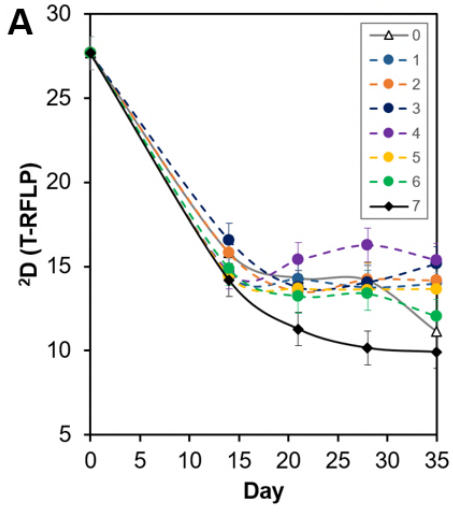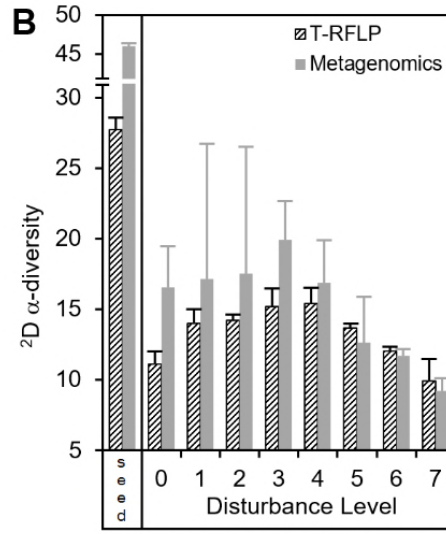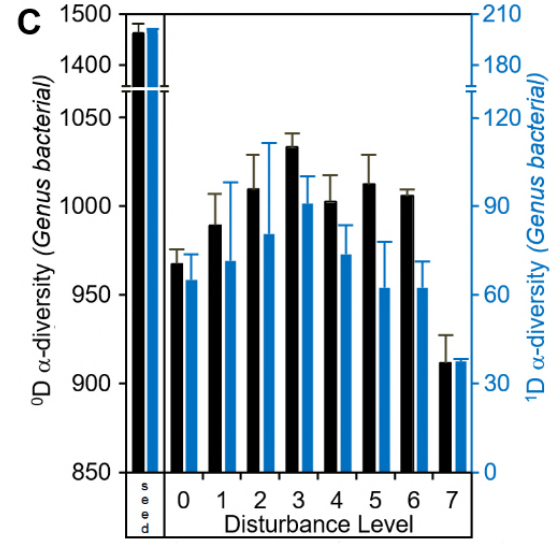

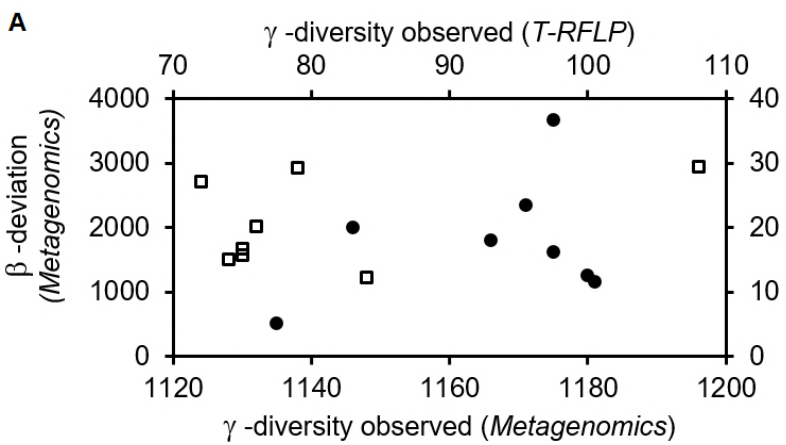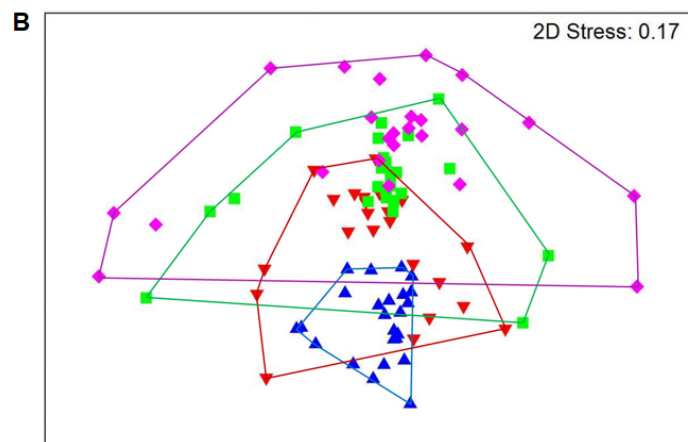



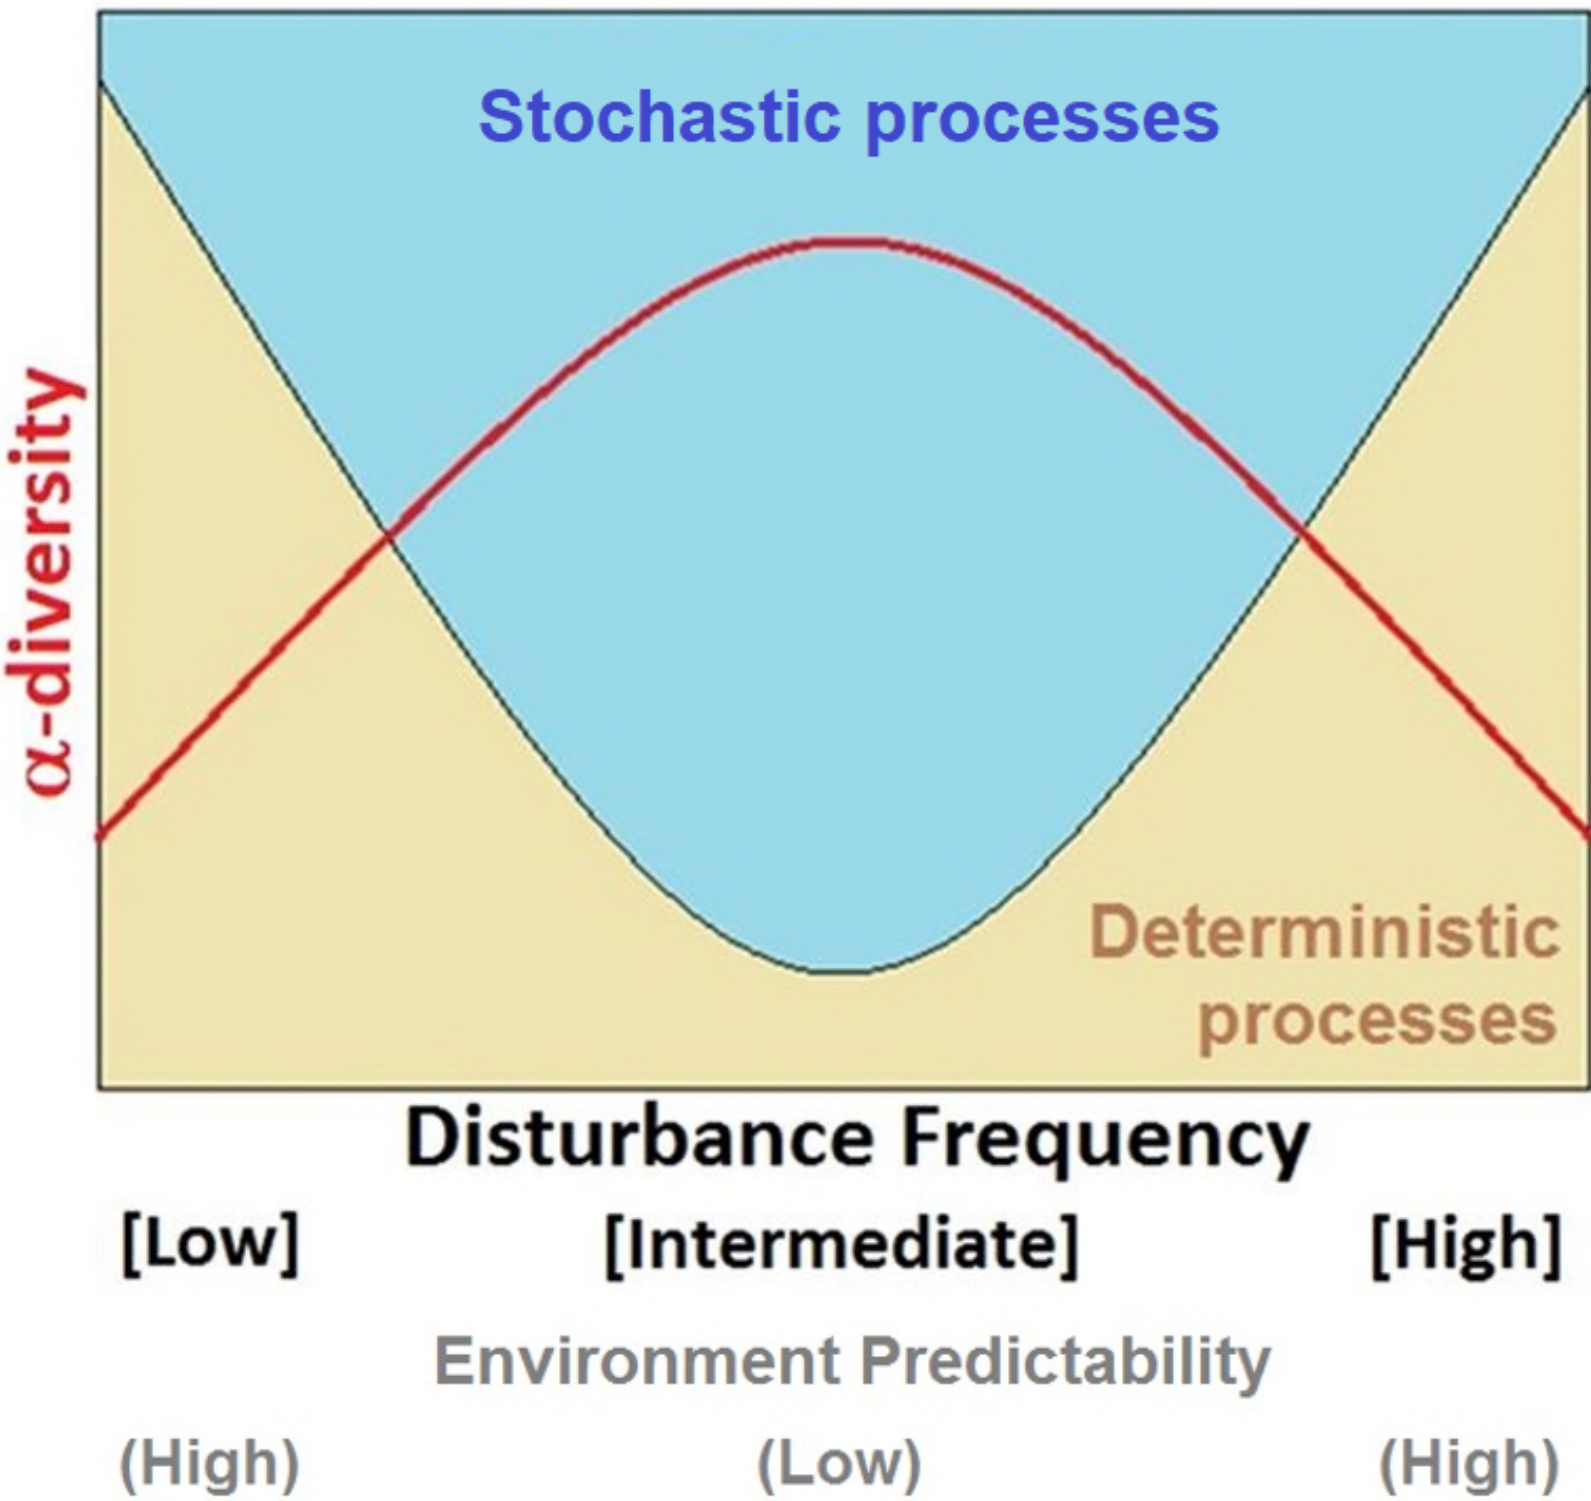

Source: https://www.biorxiv.org/content/biorxiv/early/2018/05/04/313585.full.pdf
